# Supplementary material for: Synthesis of a UCNPs@SiO2@gadofullerene nanocomposite and its application in UCL/MR bimodal imaging
Source: Royal Society of Chemistry journal article supplement (doi:10.1039/c6ra21295f), 2016-01-01
Supplement: c6ra21295f1.pdf [file c6ra21295f1.pdf]

SUPPLEMENTARY INFORMATION:

## Synthesis of a UCNP@ SiO<sub>2</sub>@ Gadofullerenes nanocomposite and its application in UCL/MR Bimodal Imaging

Cheng Li <sup>ac</sup>, Rongli Cui <sup>a</sup>, Liangzhu Feng <sup>b</sup>, Juan Li <sup>a</sup>, Huan Huang <sup>a</sup>, Huanli Yao <sup>ac</sup>, Xihong Guo <sup>a</sup>, Jinquan Dong <sup>a</sup>, Gengmei Xing <sup>a</sup>, Zhuang Liu <sup>b</sup>, Baoyun Sun <sup>\*a</sup>

*a. CAS Key Lab for Biomedical Effects of Nanomaterials and Nanosafety, Institute of High Energy Physics, Chinese Academy of Sciences (CAS), Beijing 100049, China. Email: sunby@ihep.ac.cn*

*b. Institute of Functional Nano & Soft Materials (FUNSOM), Collaborative Innovation Center of Suzhou Nano Science and Technology, Jiangsu Key Laboratory for Carbon-based Functional Materials and Devices, Soochow University, Suzhou, Jiangsu, 215123, China.*

*c. University of Chinese Academy of Sciences, Beijing 100049, China.*

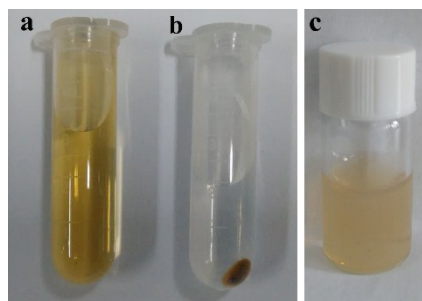

Figure S1 Digital photos of the GdF (a) and UCNP-GdF (b) after centrifugation (12,500rpm for 10min), (c) UCNP-GdF before centrifugation.
